# Supplementary material for: Methane Point Source Quantification Using MethaneAIR: A New Airborne Imaging Spectrometer
Source: Copernicus journal article supplement (doi:10.5194/egusphere-2023-822), 2023-06-01
Supplement: Supplementary file 1 [file egusphere-2023-822-supplement.pdf]

# Supplemental Materials:

## Methane Point Source Quantification Using MethaneAIR: A New Airborne Imaging Spectrometer

April 29, 2023

### S1 Calculations

#### S1.1 mIME Effective Wind Speeds

The effective wind speeds used in the mIME calculation came from the relationship proposed by Varon et al. (2018),  $U_{eff} = \alpha \cdot \log(10 \text{ m wind}) + 0.6$  where  $\alpha$  is between 0.9-1.1. We took advantage of the LES runs by introducing the LES-specific effective wind  $U_{adaptive, eff}$  for each time step.  $U_{adaptive, eff}$  is defined as  $\frac{Q \cdot L}{IME}$ . Because we know all the terms in this equation from the LES, we can calculate the true  $U_{adaptive, eff}$  that gives the best estimate of  $Q$ .

By calculating the  $U_{adaptive, eff}$  for all the time steps of interest, we end up with multiple pairs of  $U_{adaptive, eff}$  and  $U$ , which can be fitted into a linear regression function of the form  $U_{eff} = a \cdot \log(10 \text{ m wind}) + b$  with unique  $a$  and  $b$  coefficients.

However, the LES-specific relationship can introduce overfitting results when the data points are limited and wind speeds are low. Since the wind speeds during the controlled release experiments were lower than 5 m/s for most of the time, we decided to use the coefficients in (Varon et al., 2018) to avoid overfitting.

#### S1.2 Divergence Integral

The divergence integral method is based on the integral form of the continuity equation, which states that the net production of  $CH_4$  inside an enclosing surface,  $\int_V P$ , through an enclosing surface is given by

$$\int_V P = \int_V \vec{\nabla} \cdot c\vec{v} + \int_V \frac{dm}{dt} = 0 \quad (S1)$$

where  $c$  is the concentration of methane,  $v$  is the wind speed, and  $\langle \frac{\partial m}{\partial t} \rangle$  is the change in mass of methane with time within volume  $V$ .  $\int_V P = 0$  since there is no *in situ* production. The flux divergence can be decomposed into two terms:

$$\nabla \cdot cv = v \cdot \nabla c + c \cdot \nabla v \quad (S2)$$

Conley et al. (2017) demonstrate that for wind speeds over 1 m/s and fluxes above 200 kg/hr, the wind divergence term (2nd term in Eq. S2) near a source is 1% or less of the concentration gradient term (1st term in Eq. S2); therefore, we can neglect the 2nd term for our application. To isolate the  $XCH_4$  enhancement relative to the surroundings, we subtract the mean column  $XCH_4$  along the rectangle from the divergence term, which does not alter  $\nabla c$ , because  $\nabla \langle c \rangle = 0$

$$c' = c - \langle c \rangle \quad (S3)$$

$$\nabla c = \nabla (\langle c \rangle + c') = \nabla c' \quad (S4)$$

where  $c'$  is the  $XCH_4$  enhancement and  $\langle c \rangle$  is the mean  $XCH_4$  around the rectangle. For MethaneAIR data,  $c'$  was calculated from the measured  $XCH_4$  as follows:

$$c' = (XCH_4 - \langle XCH_4 \rangle_{rect.}) * n_{column} * M_{CH_4} \quad (S5)$$

where  $n_{column}$  is the moles of air in the column based on the surface pressure from HRRR and  $M_{CH_4}$  is the molar mass of methane.

For analysis of the total column data from MethaneAIR in the vicinity of an emission source, we assume that methane concentrations above the planetary boundary layer are equal to unperturbed values outside the bounding surface. Then the horizontal gradients of  $\text{XCH}_4$  arise entirely in the boundary layer, and we may take  $v$  to be the pressure-weighted mean boundary layer wind speed and direction.

We then use Gauss’s theorem to relate the volume integral to a surface integral around the cuboid:

$$0 = \int_V v \cdot \nabla c' dV + \left\langle \frac{\partial m}{\partial t} \right\rangle = -\Phi_{surf} + \oint_{\partial V=S} v \cdot \hat{n} c' dS + \left\langle \frac{\partial m}{\partial t} \right\rangle \quad (\text{S6})$$

where  $\Phi_{surf}$  is the flux into the volume from the land surface,  $S$  is the surface enclosing the cuboid and  $\hat{n}$  is an outward pointing unit vector normal to the surface. For a volume the size of a single plume, the term  $\left\langle \frac{\partial m}{\partial t} \right\rangle$  should be insignificant, assuming that the plume is in steady state and no mass is building up in the volume. We assume that the vertical flux through the top of the cuboid at the planetary boundary layer (PBL) height is zero, consistent with neglecting the divergence of the horizontal wind. Thus, we assume that the horizontal flux through the surface is balanced by and therefore equal to the flux through the bottom of the cuboid from the surface source,  $\Phi_{surf}$ , (kg/hr) we wish to measure. Combining equations (A5) and (A6) and, the flux from the source is computed from observed  $\text{XCH}_4$  as follows:

$$\Phi_{surf} = \sum_{\text{around rect}} (\text{XCH}_{4_i} - \langle \text{XCH}_4 \rangle_{rect.}) \cdot n_{\text{column}} \cdot M_{\text{CH}_4} \cdot v \cdot \hat{n} \cdot \Delta l \quad (\text{S7})$$

where  $\Delta l$  is the distance between successive  $\text{XCH}_4$  measurements. We average the fluxes calculated over a sequence of rectangles, extending downwind of the source, spanning several eddy scales. (see Fig. 2)

### S1.3 The Ratio Method

We developed a new method based on WRF-LES-HRRR outputs assuming that the LES plumes represented the actual plumes in both areas and concentration distributions within the plume. At a given location and time, the probabilistic distribution of methane plumes should be similar at any emission rate. The emission rates should linearly depend on the magnitude of concentrations, which can be written as

$$\frac{Q_{unknown}}{Q_{known}} = \frac{IME_{unknown}}{IME_{known}}.$$

$IME_{known}$  refers to the values from the LES simulations with nominal emission rate (usually 988 kg/hr). Thus, the emission rates of the observed plumes are a function of the nominal emission rate of the simulated plumes multiplied by the ratio of the total masses of the observed plumes to the simulated plumes. The relationship can be expressed as

$$Q_{unknown} = Q_{known} \cdot \frac{IME_{unknown}}{IME_{known}}. \quad (\text{S8})$$

This ratio method was first used in (Irakulis-Loitxate et al., 2021). It is applicable to very large sources with plumes large enough to be well represented by the 111 m  $\times$  111 m resolution. Since LES cannot capture the shape of a snapshot of the observed plume due to large stochastic variations of the atmosphere, we use a range of snaps across time to represent the observed plumes for these two LES methods. We took the standard deviation of the emission rates calculated from 7 snapshots across a 30 minutes interval (15 minutes before and 15 minutes after the retrieval), 5 minutes apart from one another, to avoid autocorrelation effects. For the MethaneAIR data from RF04 and RF05 flights, only a few plumes were large enough to be assessed with the ratio and this method is not used in our post-unblinding analysis.

### S1.4 Gridding by Nearest Neighbor and Physics-Based Methods

The nearest neighbor method for gridding used the R function binMean from the oce package to place the georeferenced  $\text{XCH}_4$  data onto a predefined 10m  $\times$  10m grid. The retrieved  $\text{XCH}_4$  values have a standard deviation of about 80 ppb. Since the the point spread function is about 12 m wide across the track, and 35 m along track, the grid of native pixels spatially oversamples the image on the ground. Therefore we spatially filtered the retrieved  $\text{XCH}_4$  data to create the gridded product in two steps. First, the holes in the initial gridded field were filled using a 3x3 averaging matrix. Then we further spatially filtered this field by a Gaussian filter with full width at half maximum of 1.7 pixels before inputting the  $\text{XCH}_4$  values to our point source quantification methods. The resulting oversampled gridded product has a standard deviation of 40 ppb and a spatial correlation length of about 20 m, comparable to the length scale of the point spread function. The nearest-neighbor gridding method was used for the initial (blinded) input from Harvard to Stanford.

The improved estimates after unblinding used the “physics-based” gridding method of Sun et al. (2018).

## S1.5 York Regression

When errors in the observables are present on both the x-axis and the y-axis, it is recommended to use York regression and other equations derived from York to determine the slope, y-intercept, and errors of the least-square estimation solutions. The full equations and derivations can be found on York (1968) and York et al. (2004)

## S1.6 Mean Percentage Error

$$MPE = \frac{100\%}{n} \sum_{t=1}^n \frac{a_t - f_t}{a_t} \quad (S9)$$

where  $a_t$  is the actual value of the quantity being forecast,  $f_t$  is the forecast, and  $n$  is the number of different times for which the variable is forecast.

# S2 Additional Results

## S2.1 Blinded Volume-Controlled Release Experiments

The release rate was measured by a Sierra 640i QuadraTherm meter. Stanford performed an extensive set of meter intercomparison tests to characterize uncertainty in the QuadraTherm 640i meters (Rutherford et al. (2023)). Based on these intercomparison tests, a bias of up to 6% can be observed between QuadraTherm 640i meters. Error in metered controlled release volumes is characterized using a Monte Carlo analysis that also accounts for uncertainty in gas composition.

On seven occasions during the missions, the Stanford team informed the MethaneAIR team of the wind direction at the site since winds were light and variable as reported by nearby ASOS systems. The MethaneAIR team considered reorienting the flight track to capture the plumes due to the wind conditions, but no changes in the flight track were required. On two occasions, Stanford confirmed that local winds were not zero. Although null winds were not desired for this first test of MethaneAIR, since the winds were not zero, the decision was made to complete the surveys as planned.

For the analysis, the MethaneAIR team preferred to use York fit, which accounts for uncertainties in both the X and the Y coordinates, instead of the commonly used OLS, which only accounts for uncertainties in the Y coordinate. York fit allows the remaining errors (besides mIME quantification errors and the metered errors) to be weighted in both coordinates. Thus, the York fit should be, by design, closer to the desired Maximum Likelihood Estimator value for the relationship between the Harvard values and the Stanford emission rates.

The MethaneAIR team conducted tests on the OLS to verify whether the OLS is an appropriate regression choice. The slope of the OLS line relating the Harvard mIME emissions to the Stanford blinded-volume controlled release rates is 0.78 for the original submission. Based on the heteroskedasticity test, this OLS fit violates the assumptions for linear regression (p-value 0.006). The violation suggests a significant relationship between the residuals and the predictor (Stanford emission rates). However, when using the Non-Constant Error Variance test (ncvTest), the p-value is 0.14, suggesting significant violation only at the 84% level.

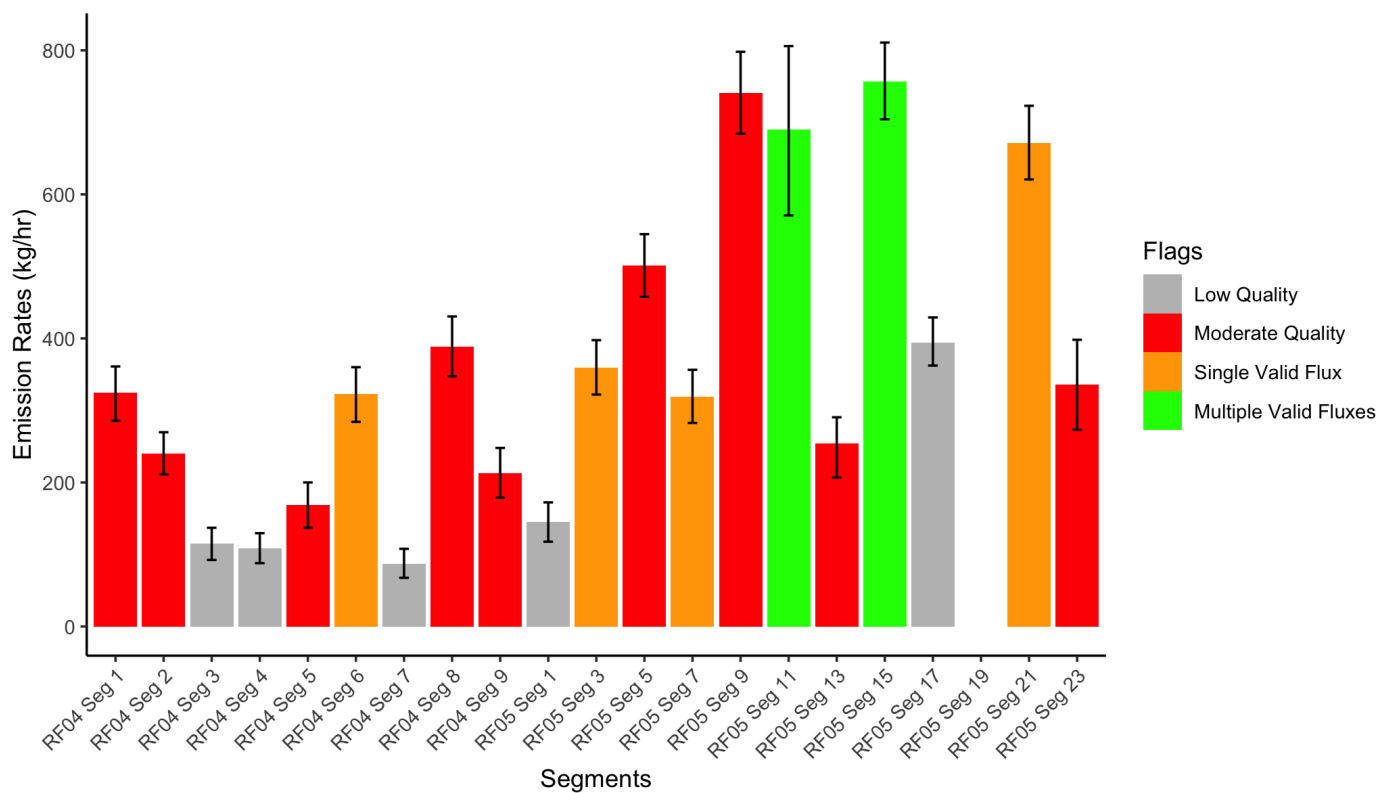

Figure S1: Post-unblinding best estimates of methane emissions from the controlled release experiments during RF04 and RF05 using the mIME method. The endpoints are tagged and color-coded according to the Decision Tree in section S11.

Table S1: RF04 and RF05 combined best estimate results from the blinded-volume controlled release experiments (32.053 °N, 102.301 °W) and MethaneAIR Level 3 Gaussian filtered data on 30 July 2021 (RF04) and 3 August 2021 (RF05). The times are in UTC. The emission rates, lower bounds, and upper bounds are in kg/hr. The blinded, blinded lower, and blinded upper columns were reported to the Stanford team as MethaneAIR initial emission estimates on 1 February 2022. The unblinded, unblinded lower, and unblinded upper columns were added after the unblinding process. The upper and lower bound estimates were calculated using the method described in Section 2.5.

| Seg | Timestamp (UTC) | Blinded | Blinded Lower | Blinded Upper | Unblinded | Unblinded Lower | Unblinded Upper | Flagged |
|-----|-----------------|---------|---------------|---------------|-----------|-----------------|-----------------|---------|
| 1   | 30/7/21 15:41   | 321.74  | 179.30        | 471.71        | 324.55    | 285.64          | 361.07          | No      |
| 2   | 30/7/21 15:52   | 232.19  | 133.63        | 338.38        | 240.14    | 211.28          | 269.73          | No      |
| 3   | 30/7/21 16:07   | 109.22  | 62.73         | 160.03        | 114.76    | 92.43           | 137.06          | Yes     |
| 4   | 30/7/21 16:22   | 102.76  | 59.80         | 151.54        | 108.16    | 87.96           | 129.54          | Yes     |
| 5   | 30/7/21 16:36   | 152.31  | 90.07         | 222.33        | 168.53    | 137.12          | 200.03          | No      |
| 6   | 30/7/21 16:51   | 225.42  | 99.69         | 392.61        | 322.45    | 284.06          | 360.08          | No      |
| 7   | 30/7/21 17:06   | 82.21   | 33.30         | 136.95        | 87.43     | 67.63           | 107.83          | Yes     |
| 8   | 30/7/21 17:22   | 362.67  | 138.79        | 613.80        | 388.06    | 347.49          | 430.51          | No      |
| 9   | 30/7/21 18:08   | 205.48  | 89.54         | 331.16        | 213.25    | 178.73          | 247.93          | Yes     |
| 1   | 3/8/21 15:53    | 140.85  | 76.46         | 211.86        | 140.85    | 76.46           | 211.86          | Yes     |
| 3   | 3/8/21 16:11    | 344.58  | 189.55        | 512.42        | 344.58    | 189.55          | 512.42          | No      |
| 5   | 3/8/21 16:30    | 472.22  | 280.28        | 682.46        | 472.22    | 280.28          | 682.46          | No      |
| 7   | 3/8/21 16:49    | 299.01  | 197.33        | 415.01        | 299.01    | 197.33          | 415.01          | No      |
| 9   | 3/8/21 17:06    | 694.32  | 537.16        | 859.69        | 694.32    | 537.16          | 859.69          | No      |
| 11  | 3/8/21 17:24    | 648.93  | 521.87        | 791.07        | 648.93    | 521.87          | 791.07          | No      |
| 13  | 3/8/21 17:41    | 243.47  | 166.76        | 326.58        | 243.47    | 166.76          | 326.58          | Yes     |
| 15  | 3/8/21 17:59    | 730.75  | 494.07        | 987.37        | 730.75    | 494.07          | 987.37          | No      |
| 17  | 3/8/21 18:15    | 385.89  | 288.5         | 487.62        | 385.89    | 288.50          | 487.62          | Yes     |
| 19  | 3/8/21 18:35    | NA      | NA            | NA            | NA        | NA              | NA              | No      |
| 21  | 3/8/21 18:53    | 525.67  | 342.93        | 727.14        | 525.67    | 342.93          | 727.14          | No      |
| 23  | 3/8/21 19:11    | 173.21  | 118.33        | 231.18        | 173.21    | 118.33          | 231.18          | No      |

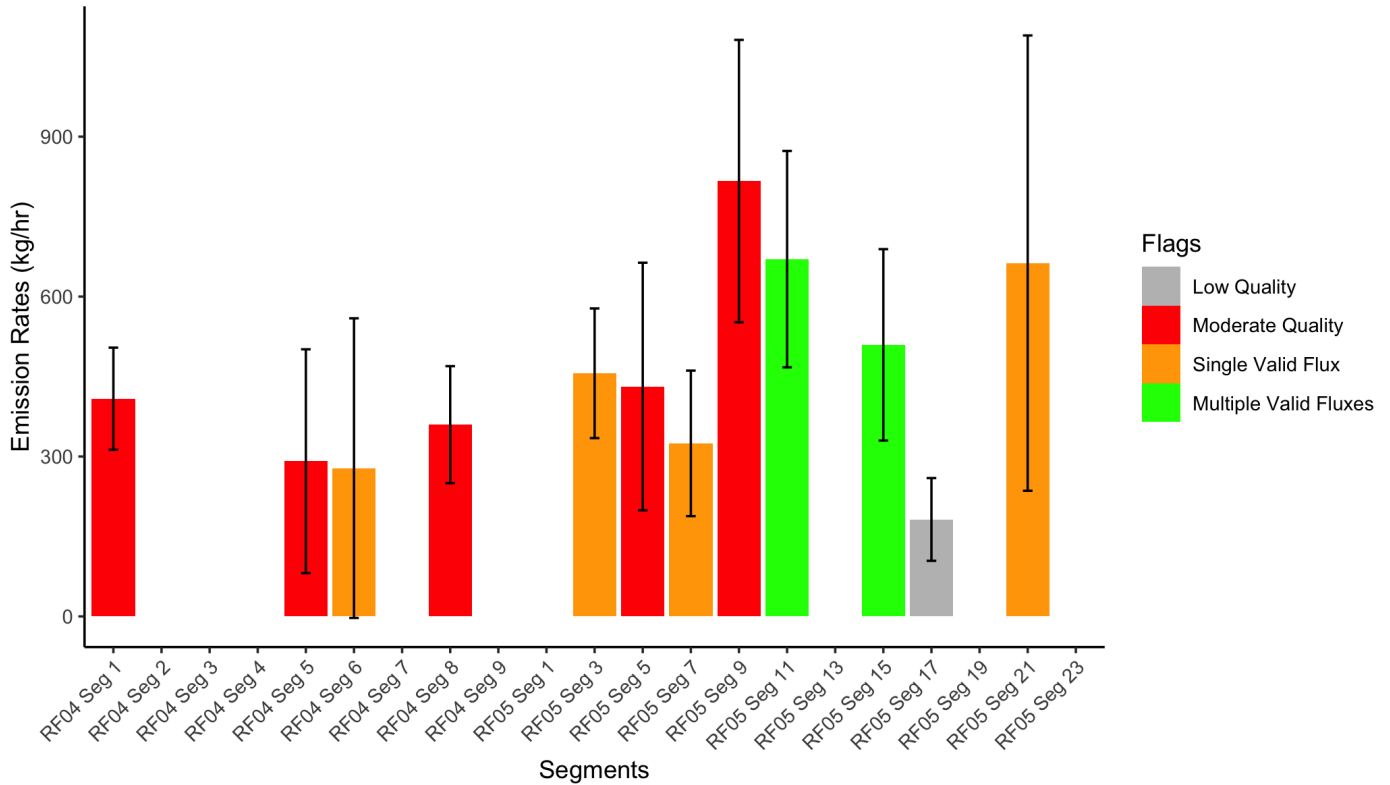

Figure S2: Post-unblinding methane emission estimates from the blinded-volume controlled release experiments during RF04 and RF05 using the DI method. The endpoints are tagged and color-coded according to the Decision Tree in section S11.

Table S2: DI results from the blinded-volume controlled release experiments (32.053 °N, 102.301 °W) and MethaneAIR Level 3 Gaussian filtered data on 30 July 2021 and 3 August 2021. The times are in UTC. The emission rates, lower bounds, and upper bounds are in kg/hr.

| Seg | Timestamp (UTC) | Unblinded Estimate | Lower Bound | Upper Bound |
|-----|-----------------|--------------------|-------------|-------------|
| 1   | 30/7/21 15:41   | 408.43             | 312.61      | 504.25      |
| 2   | 30/7/21 15:52   | NA                 | NA          | NA          |
| 3   | 30/7/21 16:07   | NA                 | NA          | NA          |
| 4   | 30/7/21 16:22   | NA                 | NA          | NA          |
| 5   | 30/7/21 16:36   | 291.14             | 81.20       | 501.09      |
| 6   | 30/7/21 16:51   | 278.21             | -2.83       | 559.24      |
| 7   | 30/7/21 17:06   | NA                 | NA          | NA          |
| 8   | 30/7/21 17:22   | 359.74             | 250.00      | 469.49      |
| 9   | 30/7/21 18:08   | NA                 | NA          | NA          |
| 1   | 3/8/21 15:53    | NA                 | NA          | NA          |
| 3   | 3/8/21 16:11    | 456.12             | 334.50      | 577.73      |
| 5   | 3/8/21 16:30    | 431.36             | 199.19      | 663.53      |
| 7   | 3/8/21 16:49    | 324.64             | 188.14      | 461.15      |
| 9   | 3/8/21 17:06    | 816.66             | 551.81      | 1081.50     |
| 11  | 3/8/21 17:24    | 670.18             | 467.17      | 873.18      |
| 13  | 3/8/21 17:41    | NA                 | NA          | NA          |
| 15  | 3/8/21 17:59    | 509.45             | 329.93      | 688.98      |
| 17  | 3/8/21 18:15    | 181.93             | 104.31      | 259.54      |
| 19  | 3/8/21 18:35    | NA                 | NA          | NA          |
| 21  | 3/8/21 18:53    | 662.77             | 235.70      | 1089.84     |
| 23  | 3/8/21 19:11    | NA                 | NA          | NA          |

Table S3: Original results for all methods from the blinded-volume controlled release experiments (32.053 °N, 102.301 °W) and MethaneAIR Level 3 Gaussian filtered data on 30 July 2021 and 3 August 2021. The emission rates, lower bounds, and upper bounds are in kg/hr. This table was reported to the Stanford team as MethaneAIR initial emission estimates on 1 February 2022. The times are in UTC. The bounds were calculated using the method described in Section 2.5. The SNR is the signal-to-noise ratio. The SL is the scale length of each plume in meters

| Seg | Timestamp (UTC) | IME    | IME.l  | IME.u  | Ratio   | Ratio.l | Ratio.u | Gaussian | Gauss.l | Gauss.u | SNR  | SL     |
|-----|-----------------|--------|--------|--------|---------|---------|---------|----------|---------|---------|------|--------|
| 1   | 30/7/21 15:41   | 321.74 | 312.25 | 330.84 | 1267.08 | 1072.46 | 1419.36 | 387.04   | 318.53  | 455.55  | 2.33 | 153.92 |
| 2   | 30/7/21 15:52   | 232.19 | 222.98 | 241.58 | 765.04  | 631.16  | 885.97  | NA       | NA      | 4.44    | 2.45 | 128.82 |
| 3   | 30/7/21 16:07   | 109.22 | 102.16 | 115.46 | 206.19  | 159.37  | 250.17  | NA       | NA      | NA      | 2.19 | 79.98  |
| 4   | 30/7/21 16:22   | 102.76 | 94.56  | 110.81 | 224.24  | 189.35  | 255.61  | NA       | NA      | NA      | 2.18 | 87.16  |
| 5   | 30/7/21 16:36   | 152.31 | 137.82 | 165.12 | 362.74  | 307     | 412.7   | 253.13   | 158.86  | 347.39  | 2.26 | 106.28 |
| 6   | 30/7/21 16:51   | 291.55 | 266.56 | 313.72 | 572.28  | 448.29  | 685.25  | 159.29   | 83.16   | 235.42  | 2.5  | 175.46 |
| 7   | 30/7/21 17:06   | 82.21  | 75.89  | 87.72  | 131.26  | 109.96  | 144.92  | NA       | NA      | NA      | 2.43 | 58.3   |
| 8   | 30/7/21 17:22   | 362.67 | 339.8  | 385.66 | 694.59  | 589.45  | 812.25  | 296.98   | 260.15  | 333.82  | 2.45 | 196.69 |
| 9   | 30/7/21 18:08   | 205.48 | 196.33 | 214.49 | 515.09  | 316.43  | 651.97  | 98.32    | 14.51   | 182.13  | 2.13 | 115.74 |
| 1   | 3/8/21 15:53    | 140.85 | 133.45 | 148.46 | 215.43  | 190.36  | 240.07  | NA       | NA      | NA      | 2.25 | 85.46  |
| 3   | 3/8/21 16:11    | 344.58 | 322.5  | 362.84 | 819.55  | 664.12  | 965.76  | 282.12   | 223.41  | 340.84  | 2.53 | 185.53 |
| 5   | 3/8/21 16:30    | 472.22 | 445.41 | 497.88 | 806.07  | 690.37  | 972.87  | 258.84   | 204.09  | 313.59  | 2.49 | 237.98 |
| 7   | 3/8/21 16:49    | 299.01 | 275.76 | 323.11 | 707.65  | 589.56  | 799.42  | 128.58   | 89.51   | 167.65  | 2.62 | 185.79 |
| 9   | 3/8/21 17:06    | 694.32 | 644.67 | 736.81 | 752.41  | 616.16  | 870.63  | 784.38   | 710.68  | 858.07  | 2.29 | 363.56 |
| 11  | 3/8/21 17:24    | 648.93 | 587.62 | 711.46 | 1130.2  | 784.58  | 1471.68 | 1056.21  | 981.26  | 1131.17 | 2.75 | 203.28 |
| 13  | 3/8/21 17:41    | 243.47 | 229.22 | 256.64 | 932.64  | 759.34  | 1083.86 | 313.8    | 252.26  | 375.35  | 2.02 | 128.49 |
| 15  | 3/8/21 17:59    | 730.75 | 701.77 | 761.88 | 1189.06 | 1078.02 | 1297.29 | 192.44   | 90.55   | 294.34  | 2.52 | 280.44 |
| 17  | 3/8/21 18:15    | 385.89 | 375.8  | 395.69 | 818.72  | 687.49  | 918.82  | NA       | NA      | 3.18    | 2.48 | 199.81 |
| 19  | 3/8/21 18:35    | NA     | NA     | NA     | NA      | NA      | NA      | NA       | NA      | NA      | NA   | NA     |
| 21  | 3/8/21 18:53    | 525.67 | 490.81 | 558.78 | 1242.4  | 1020.6  | 1441.07 | 328.44   | 207.52  | 449.37  | 2.83 | 171.8  |
| 23  | 3/8/21 19:11    | 173.21 | 167.15 | 178.92 | 210     | 178.99  | 234.64  | 505.73   | 447.7   | 563.76  | 2.39 | 53.87  |

Table S4: Blinded-volume controlled release data reported by the Stanford team on 1 February 2022. The cr\_kgh\_CH4\_mean90, cr\_kgh\_CH4\_lower90, and cr\_kgh\_CH4\_upper90 represent the 90-second window rolling average, lower, and upper flow rates in kg/hr. The wind speeds are in m/s. The timestamps are in UTC.

| Seg | Timestamp (UTC) | cr_kgh_CH4_mean90 | cr_kgh_CH4_lower90 | cr_kgh_CH4_upper90 | Winds |
|-----|-----------------|-------------------|--------------------|--------------------|-------|
| 1   | 30/7/21 15:41   | 358.48            | 334.29             | 384.75             | 2.8   |
| 2   | 30/7/21 15:52   | 171.08            | 154.32             | 188.05             | 2.71  |
| 3   | 30/7/21 16:07   | 49.98             | 36.06              | 63.71              | 2.44  |
| 4   | 30/7/21 16:22   | 0.00              | 0.00               | 0.00               | 2.29  |
| 5   | 30/7/21 16:36   | 236.74            | 217.42             | 256.81             | 2.36  |
| 6   | 30/7/21 16:51   | 295.08            | 273.58             | 318.53             | 2.59  |
| 7   | 30/7/21 17:06   | 95.05             | 80.53              | 109.95             | 2.68  |
| 8   | 30/7/21 17:22   | 382.25            | 356.59             | 409.77             | 2.54  |
| 9   | 30/7/21 18:08   | 63.65             | 53.99              | 73.67              | 3.29  |
| 1   | 3/8/21 15:52    | 6.72              | -2.07              | 15.42              | 2.32  |
| 3   | 3/8/21 16:11    | 495.05            | 464.61             | 528.52             | 2.28  |
| 5   | 3/8/21 16:30    | 560.57            | 527.17             | 596.61             | 2.27  |
| 7   | 3/8/21 16:48    | 297.28            | 277.02             | 318.78             | 2.03  |
| 9   | 3/8/21 17:06    | 654.38            | 615.38             | 695.86             | 1.92  |
| 11  | 3/8/21 17:24    | 690.80            | 648.48             | 734.36             | 2.07  |
| 13  | 3/8/21 17:41    | 0.00              | 0.00               | 0.00               | 2     |
| 15  | 3/8/21 17:59    | 382.28            | 356.57             | 409.38             | 1.64  |
| 17  | 3/8/21 18:15    | 129.63            | 113.98             | 145.39             | 1.87  |
| 19  | 3/8/21 18:35    | 56.05             | 41.93              | 70.22              | 2.48  |
| 21  | 3/8/21 18:53    | 446.05            | 417.23             | 476.86             | 2.42  |
| 23  | 3/8/21 19:11    | 236.63            | 217.37             | 256.66             | 2.21  |

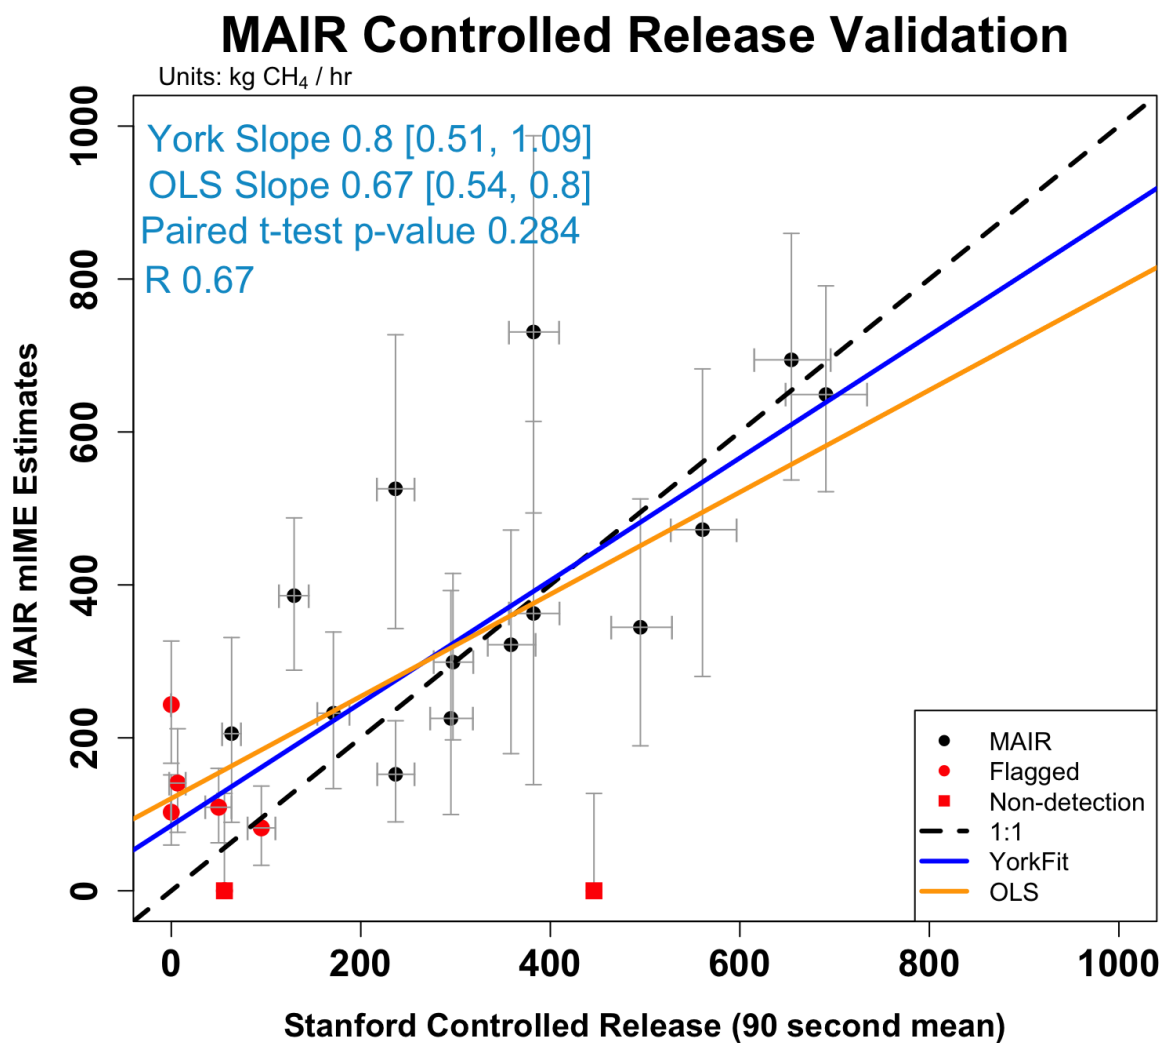

Figure S3: An analogous plot of Figure 3. The results presented in this figure are based on the “best estimates” reported on 1 February 2022. The black circles represent the post-unblinding comparison between the reported and estimated emissions. The red square represents the original comparison which was later identified as no detection and removed. The blue solid line is the post-unblinding York fit. The orange is the Ordinary Least Squares (OLS) fit. This figure was not included in the original unblinding because the MethaneAIR team did not have metered rates.

# MAIR Controlled Release Validation

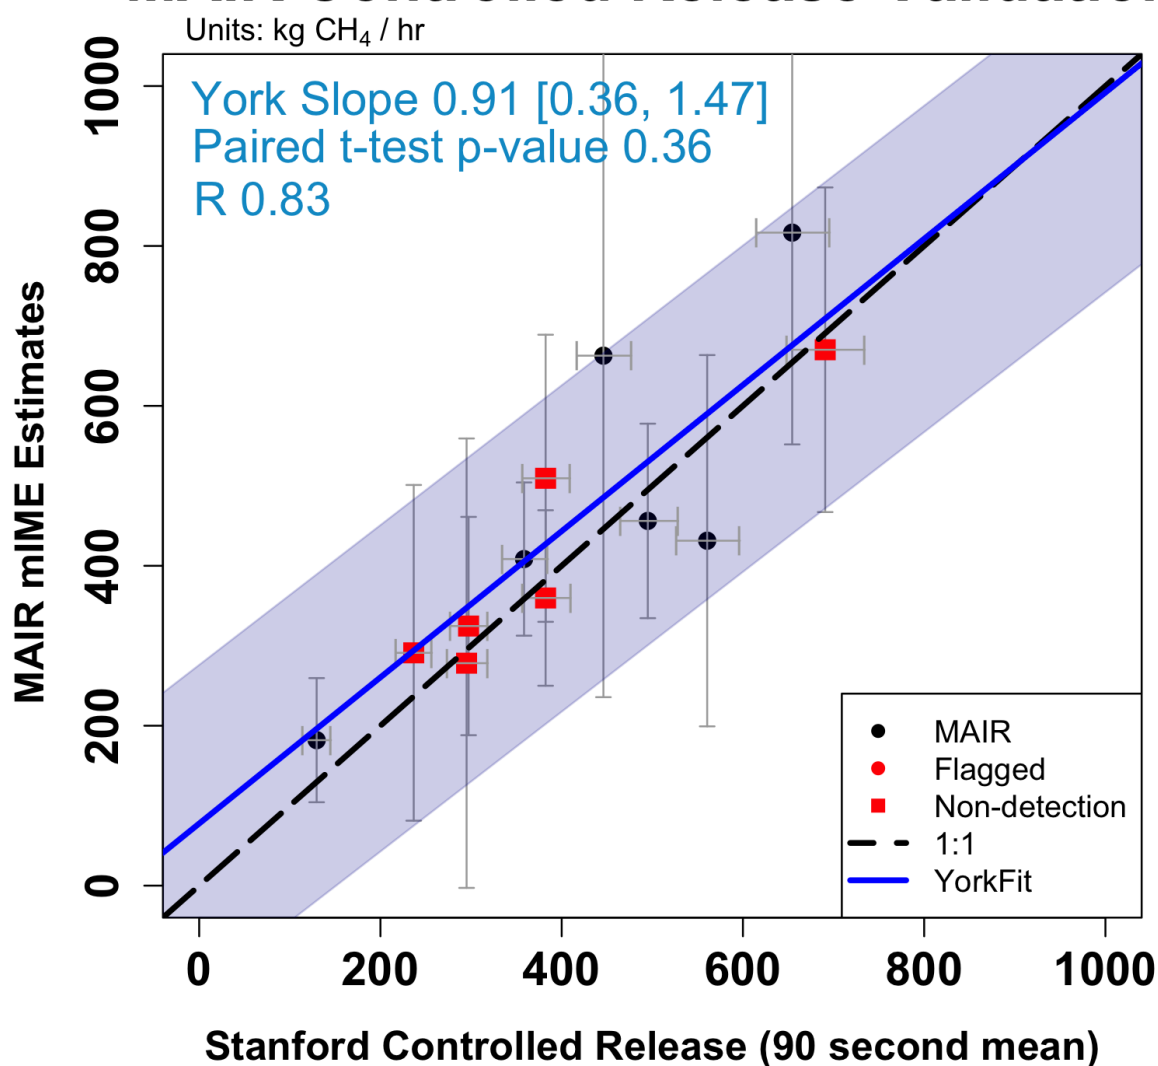

Figure S4: An analogous plot of Figure 3. The results presented in this figure are based on the post-unblinding estimates using the DI results. The black circles represent the post-unblinding comparison between the reported and estimated emissions. The red square represents the original comparison which was later identified as no detection and removed. The blue solid line is the post-unblinding York fit.

## S2.2 Unlit Flare

As shown in Figure S6, the flare emission rates range from 500 kg/hr to 2000 kg/hr.

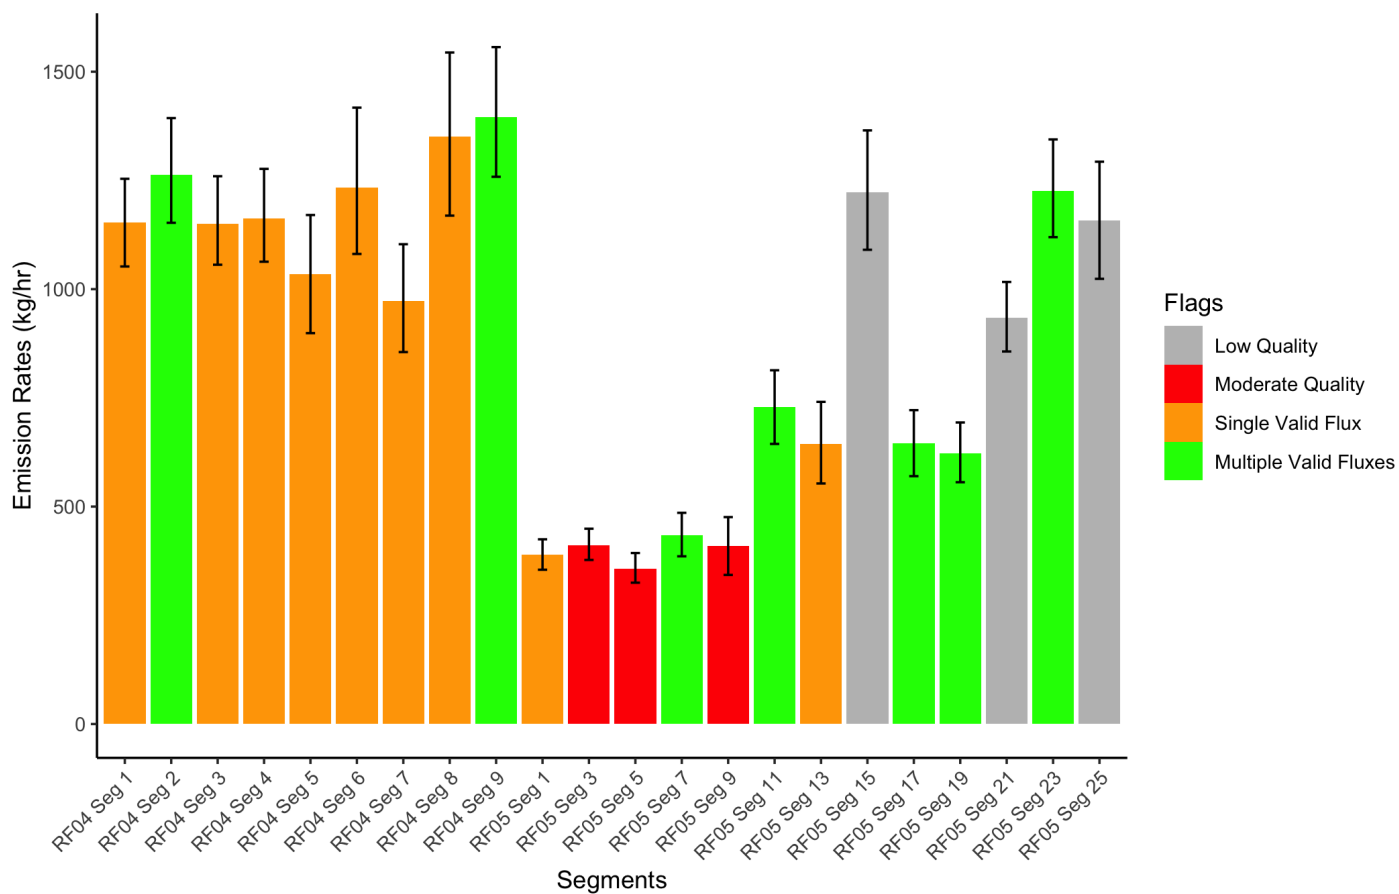

Figure S5: Methane emission estimates from an unlit flare during RF04 and RF05 using the mIME method. The endpoints are tagged and color-coded according to the Decision Tree in section S11.

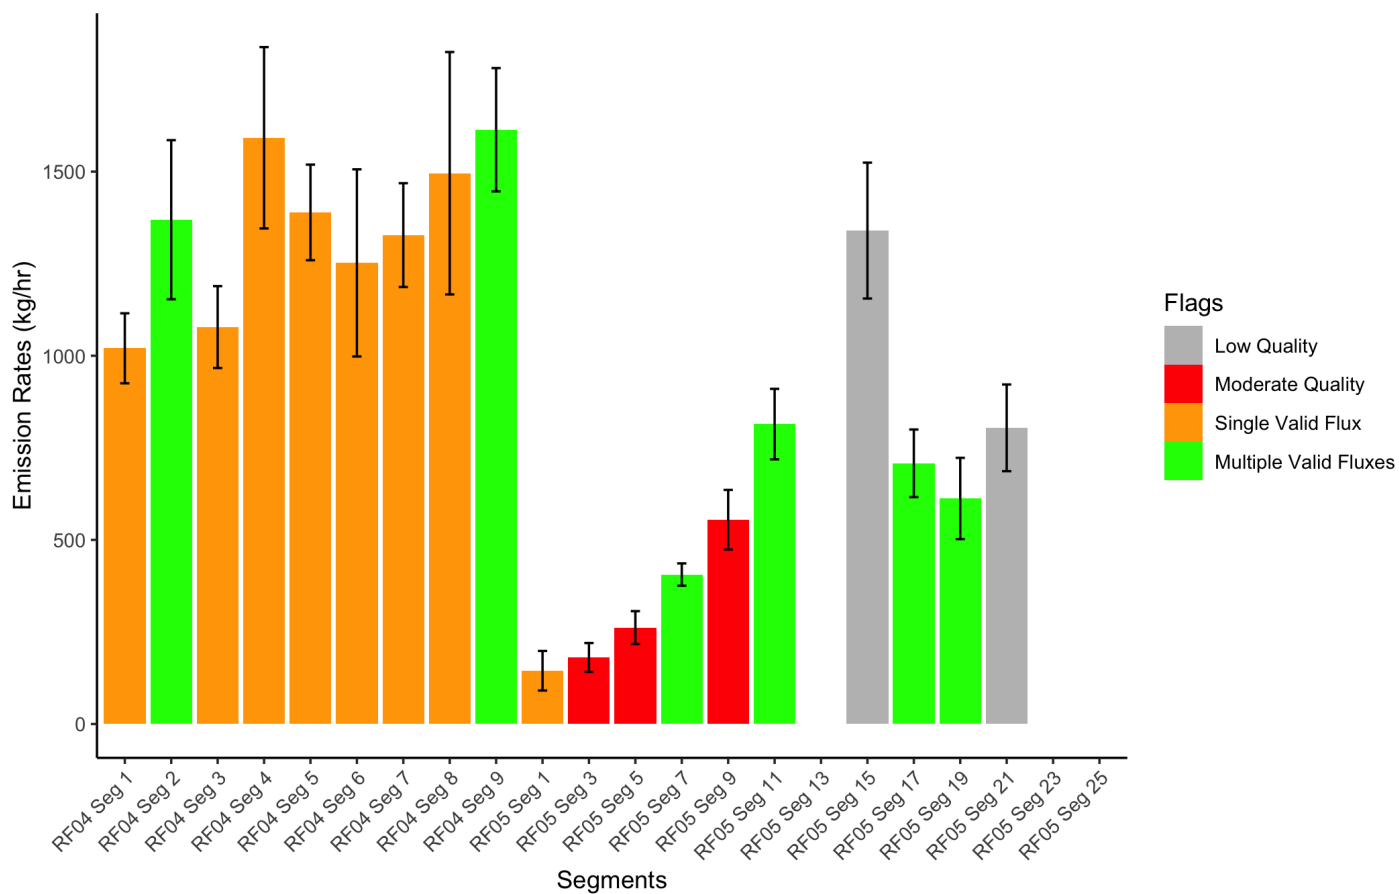

Figure S6: Methane emission estimates from an unlit flare during RF04 and RF05 using the DI method. The endpoints are tagged and color-coded according to the Decision Tree in section S11.

## S2.3 MVD & Pipeline

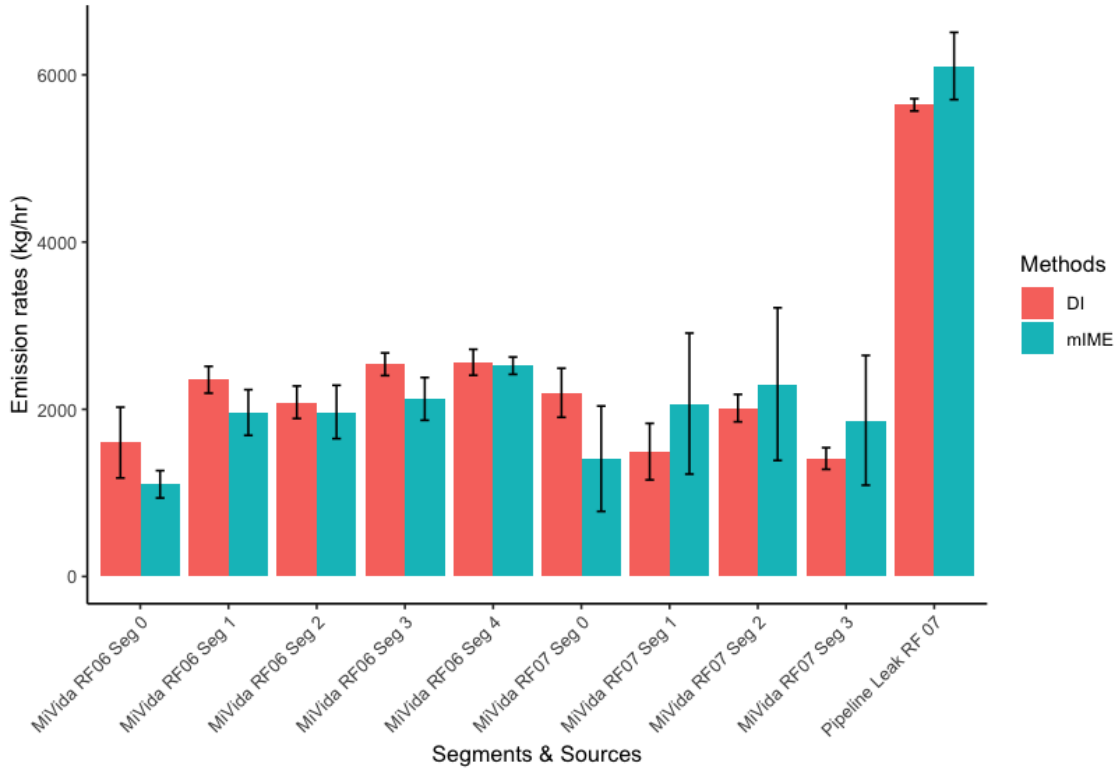

Figure S7: Barplot of the miscellaneous sources quantified in the Delaware Basin.

## S3 Analysis Methods

### S3.1 Wind Analysis

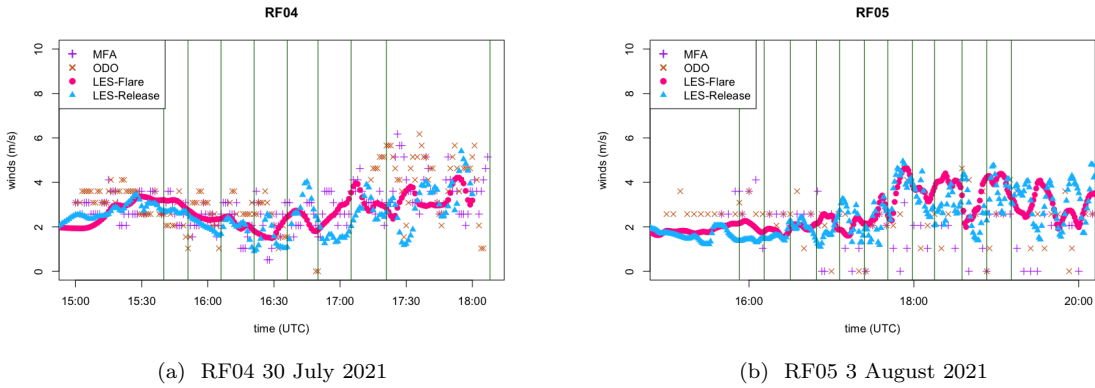

Figure S8: ASOS surface wind comparison from the blinded-volume controlled release experiments during (a) RF04 on 30 July 2021 and (b) RF05 on 3 August 2021. The purple crosses represent ASOS winds from the Midland International Air & Space Port (MAF), which is 15 km from the blinded-volume controlled release site. The orange x's represent ASOS winds from the Odessa-schlemeyer Field Airport (ODO), which is 17 km from the blinded-volume controlled release site. The magenta circles represent surface winds from the LES at the flare. The blue triangles represent surface winds from the LES at the blinded-volume controlled release site. The dark green vertical lines represents times when MAIR flew over the targets. All LES winds during the controlled release experiments and unlit flare observation agree with the ASOS winds (two-sided t-test p-values are greater than 0.05).

### S3.2 Wind Product Analysis

To assess our LES winds compared to mesoscale HRRR winds and winds observed at the release site, we plot the estimated emission rates against the known emission rates from the Stanford team using different wind products. As shown in Figure S9, effective wind from the LES provide the highest  $R^2$  value and slope closest to 1.

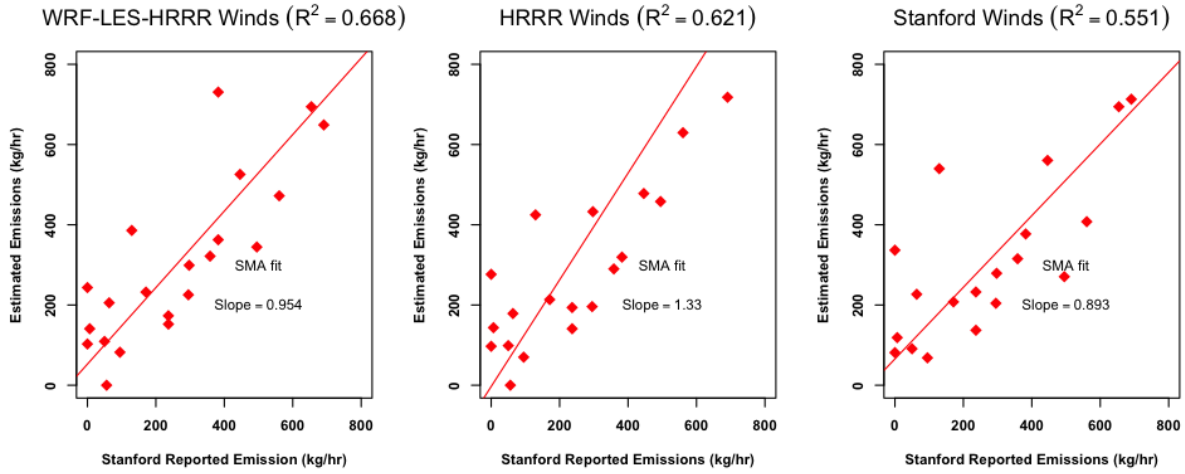

Figure S9: Estimated emission rates with the mIME using different wind products vs. the known emission rates from the Stanford team. From left to right: estimated emission rates based on effective winds from WRF-LES-HRRR, HRRR, and measured winds. The paired t-test between the estimated emissions and Stanford reported emissions suggests that we cannot reject the null hypothesis that a true difference in means is equal to 0 within 95% confidence interval for the estimated emissions based on WRF-LES-HRRR and Stanford observed winds with p-values of 0.166 and 0.309 respectively. However, the test suggests the alternative hypothesis of a true difference in means between the emissions derived from HRRR winds and the reported emissions with a p-value of 0.0408.

### S3.3 Threshold Analysis

#### RF05 Release Segment 9

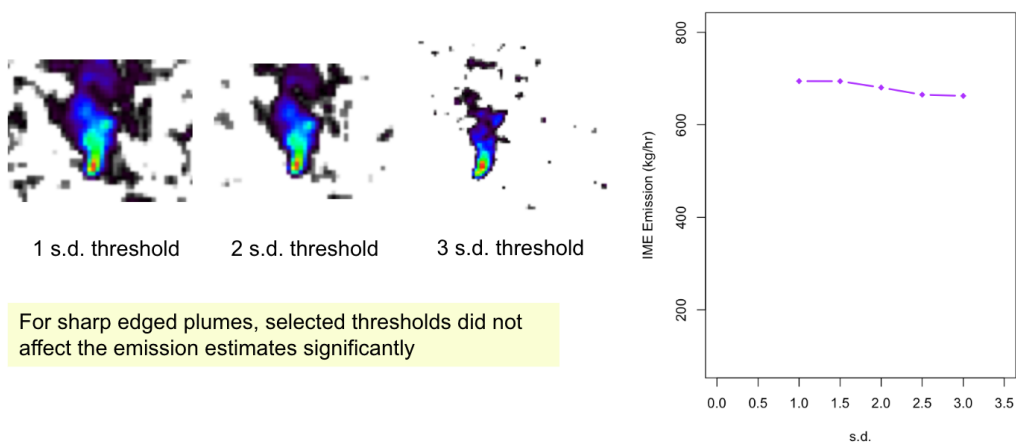

Figure S10: The thresholds do not affect the IME values of the plume of interest.

### S3.4 Decision Tree

To understand the relationship between the actual emission rates and the emission estimates, we attempted using several regression models to our data. York regression was the most appropriate one because York includes correlated errors from both axes. OLS was included this study since OLS is often used in this type of experiment.

See Sherwin et al. (2022), SI Section S4, for further discussion of tradeoffs associated with York and OLS fits in single-blind tests of methane remote sensing.

Before the actual blinded-volume controlled releases values were revealed, we developed a decision tree workflow that assigns a confidence flag to each case (Figure S11). The original version of our decision tree was developed purely based on our analysis of our measurement system and algorithms. It was then adjusted slightly after unblinding the controlled release metered emissions. When signal to noise ratio (SNR) for the plume, relative to the background is below 1 or significant interference was observed, we classify the case as either no detection (End point 0) or poor quality (End point 1). When the SNR is between 1 and 2.5, the estimates are near the detection limit providing a moderate quality estimate (End point 2). Only the mIME method can be used and the confidence is likely to be low. When the SNR is above 2.5, we checked if the size of the plume is greater than one eddy. If the plumes are smaller than one eddy, only the mIME method can be used (End point 3). If the plumes are larger than one eddy, all three methods developed were applied (End point 4). For the last step, the WRF-HRRR-LES were compared to the nearby ASOS winds and later assigned quality flags based on agreement to the observed winds. If the winds disagree (two-sided t-test p-value is less than 0.05), the wind quality is low. When winds agree (two-sided t-test p-value is greater than 0.05), the wind quality is high. All LES winds during the controlled release experiments and unlit flare observation agree within tolerance with the ASOS winds.

As expected the DI approach and the Ratio approach work well with larger sources such as the unlit flare, MiVida Gas Processing Plant, or the pipeline leak plume. However, the ratio approach is limited by the resolution mismatch with the sensor and by the domain size for the LES, which make this approach less favorable. So, we decided to proceed with the mIME and the DI methods.

After the metered blinded-volume controlled releases values were revealed, the decision tree was revised to include additional steps that help remove false positive cases and also help us determine the detection limits of MethaneAIR.

By filtering out cases that (i) have the absolute differences between mIME emission estimates using threshold of 1 and 2 standard deviations divided by emission estimate using threshold of 1 standard deviation greater than 0.5 (i.e. 2 s.d. case has a much different plume shape) or (ii) no emission estimates at threshold of 2 standard deviations, we designate as “below detection limit” 6 cases from the blinded-volume controlled release experiment. One of them was a false negative case, where methane enhancements were not detected. The other four were emission estimates around the detection limit of 200 kg/hr. The part of the decision tree added after unblinding, intended to reduce false positives in the contaminated environment of this test, is boxed in red in Figure S11.

### MethaneAIR/SAT Plume Quantification Decision Tree

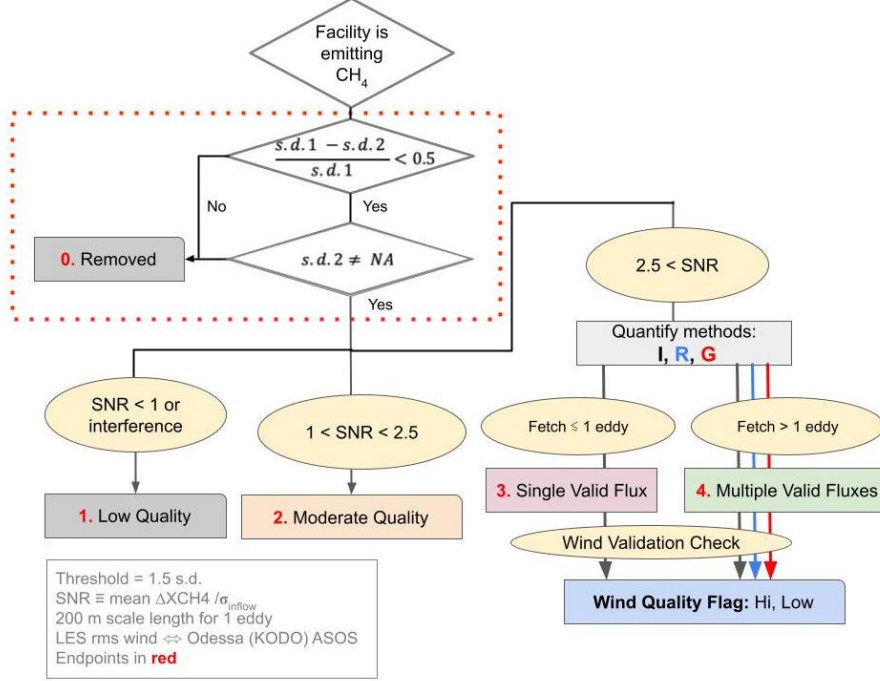

Figure S11: Updated decision tree classifying quality levels of emission estimates. Most of the steps were developed purely based on our analysis of the data and signal processing. The steps in the red dashed box were added after the unblinding process. First, we filter out all the estimates that (i) have the absolute differences between mIME emission estimates using threshold of 1 and 2 standard deviations divided by emission estimate using threshold of 1 standard deviation greater than 0.5 or (ii) no emission estimates at threshold of 2 standard deviations. After that, for each estimate with SNR below 1 or significant interference was observed, we classify the case as either no detection (End point 0) or poor quality (End point 1). When the SNR is between 1 and 2.5, the estimates are moderate quality (End point 2). Only the mIME method can be used. When the SNR is above 2.5, we checked if the size of the plume is greater than one eddy. If the plumes are smaller than one eddy, only the mIME method can be used (End point 3). If the plumes are larger than one eddy, all three different methods developed were applied (End point 4). For the last step, the WRF-HRRR-LES were compared to the nearby ASOS winds and later assigned quality flags based on agreement to the observed winds. If the winds disagree, the wind quality is low. When winds agree, the wind quality is high.

### S3.5 Additional Attempts to Determine Contamination Near the Methane Plumes

Although our decision tree (S3.4) removed 6 plumes (below detection) from the total 21 plumes based on the signal to noise ratio and the size of the plumes, we wanted to investigate the limitations of our sensors and methods further. We decided to perform two more analyses with the hypothesis that these two will help us better understand the limitations.

The first analysis was to perform a k-s test between  $XCH_4$  in the inflow region of each scene and a clear scene defined as latitude 32.10 - 32.11 and longitude -102.32 to -102.31. When the p-values of the k-s test is less than 0.05, we can reject the null hypothesis that the  $XCH_4$  observed in the inflow and clear scene came from the same distribution. A positive outcome from the K-S test suggests that there may be extraneous methane contamination in the inflow.

The second analysis was to filter the clumps with 60 pixels and 100 pixels. The new choices of thresholds are arbitrarily rounded to the multiples of original 20 pixel threshold and fractions of a large eddy (approximate 100 m). The original 20 pixel threshold or 10 m  $\times$  10 m  $\times$  20 pixels is equivalent to a 45 m  $\times$  45 m plume, which is approximately half of the size of an eddy. The 60 pixel threshold is equivalent to a 77 m  $\times$  77 m plume,

which is approximately two third of the size of an eddy. The 100 pixel threshold is equivalent to a 100 m  $\times$  100 m plume, which is approximately the size of an eddy.

Table S5: Summary table of removed (not detected) RF04 plumes based on three methods: decision tree (S3.4), 60 pixel threshold, and K-S test.

| Segment | Decision Tree | 60 pixels | K-S test |
|---------|---------------|-----------|----------|
| 1       |               |           | x        |
| 2       |               |           | x        |
| 3       | x             | x         |          |
| 4       | x             | x         |          |
| 5       |               | x         | x        |
| 6       |               |           |          |
| 7       | x             | x         |          |
| 8       |               |           |          |
| 9       | x             | x         |          |

Table S6: Summary table of removed RF05 plumes based on three methods: decision tree (S3.4), 60 pixel threshold, and K-S test.

| Segment | Decision Tree | 60 pixels | K-S test |
|---------|---------------|-----------|----------|
| 1       | x             | x         | x        |
| 3       |               |           | x        |
| 5       | x             | x         | x        |
| 7       | x             | x         |          |
| 9       |               | x         | x        |
| 11      |               |           |          |
| 13      | x             | x         | x        |
| 15      |               |           |          |
| 17      | x             | x         |          |
| 21      |               |           |          |
| 23      |               |           |          |

## S4 Cropped Blinded-Volume controlled release Plumes

The following figures are cropped blinded-volume controlled release plumes from both RF04 and RF05. The plumes were identified based on the known location of the blinded-volume controlled release site (grey triangles). To reduce the noise of the raw 1 $\times$ 1 Level 3 data, the data were later filtered by a Gaussian filter (7 pixel  $\times$  7 pixel kernel with the full width at half maximum of 2 pixels). We then identified the inflow region and removed the pixels below 1.5 standard deviation of the inflow threshold. After that, we removed the small clumps with fewer than 20 pixels from the scene of interest.

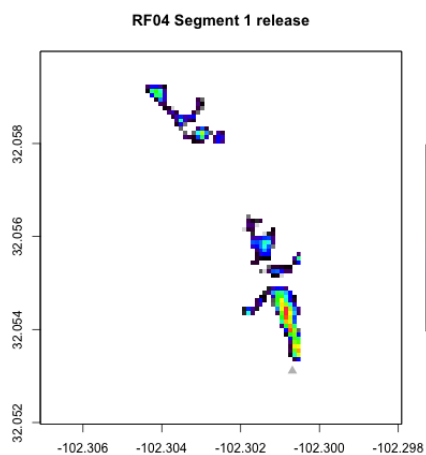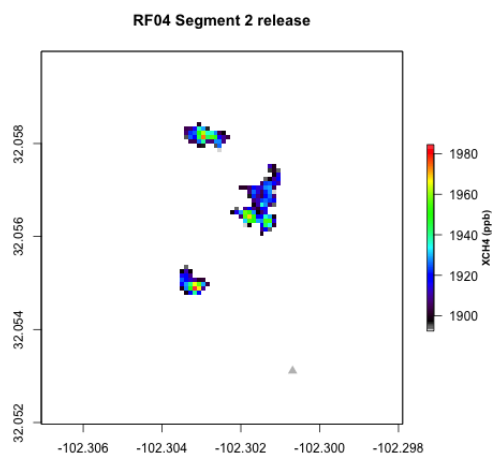

Figure S12: Filtered blinded-volume controlled release RF04 Segment 1. Figure S13: Filtered blinded-volume controlled release RF04 Segment 2.

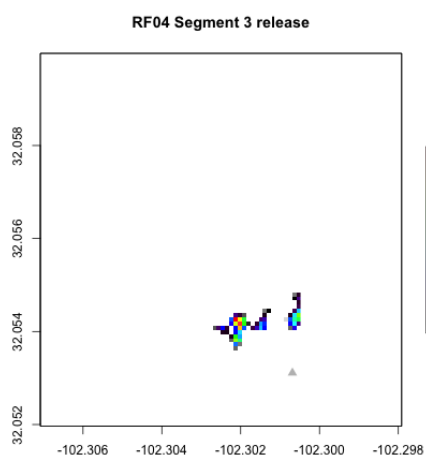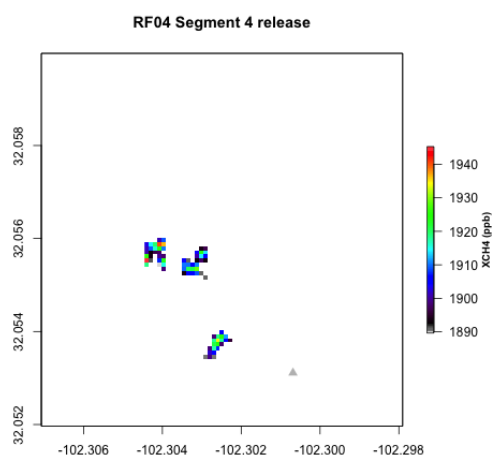

Figure S14: Filtered blinded-volume controlled release RF04 Segment 3. Figure S15: Filtered blinded-volume controlled release RF04 Segment 4.

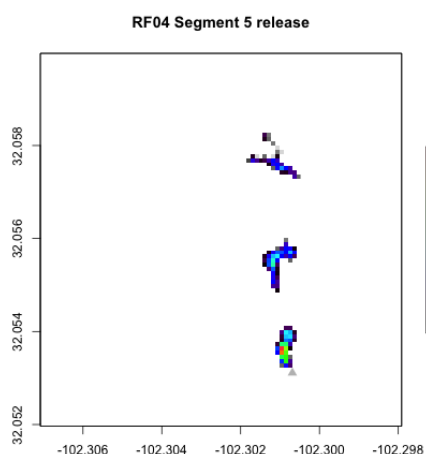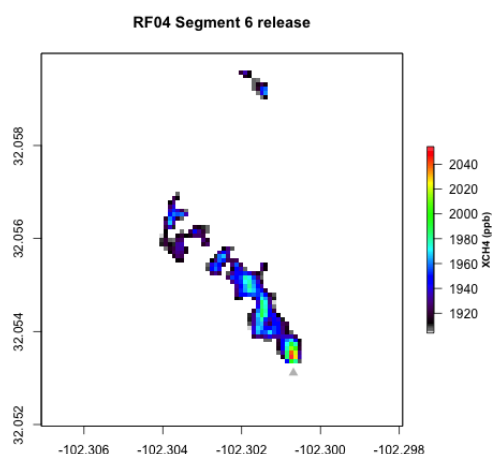

Figure S16: Filtered blinded-volume controlled release RF04 Segment 5. Figure S17: Filtered blinded-volume controlled release RF04 Segment 6.

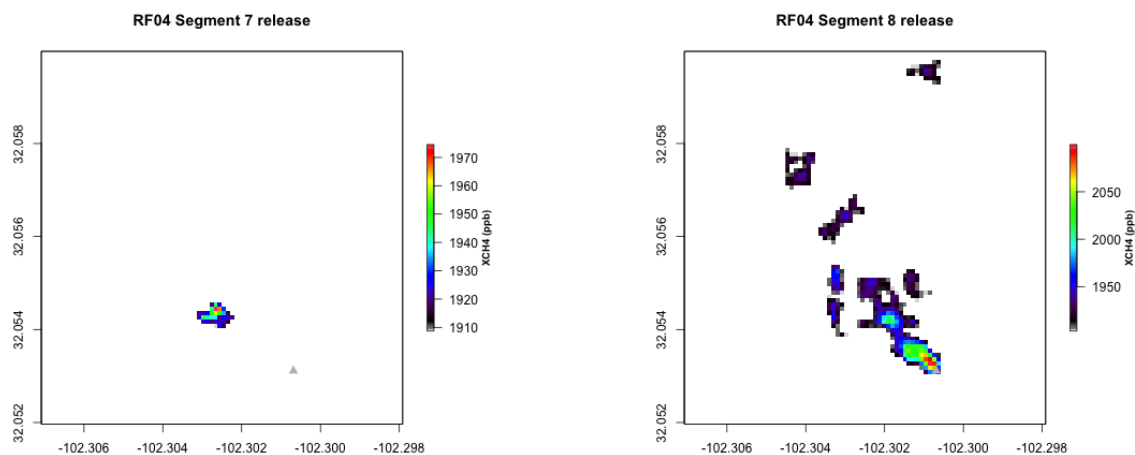

Figure S18: Filtered blinded-volume controlled release RF04 Segment 7. Figure S19: Filtered blinded-volume controlled release RF04 Segment 8.

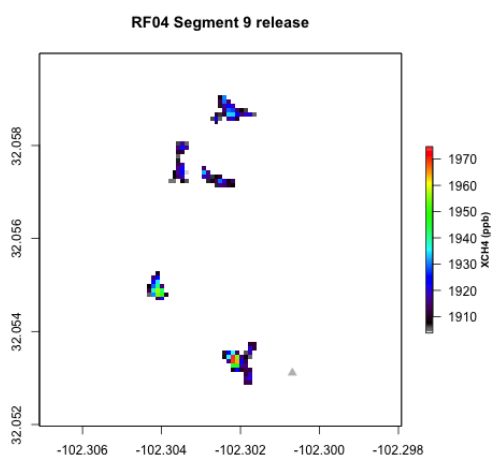

Figure S20: Filtered blinded-volume controlled release RF04 Segment 9.

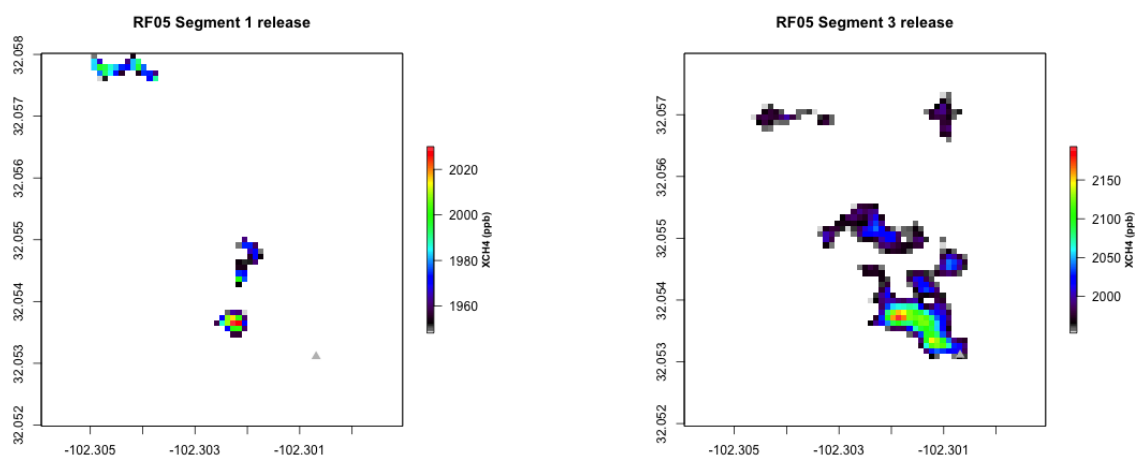

Figure S21: Filtered blinded-volume controlled release RF05 Segment 1. Figure S22: Filtered blinded-volume controlled release RF05 Segment 3.

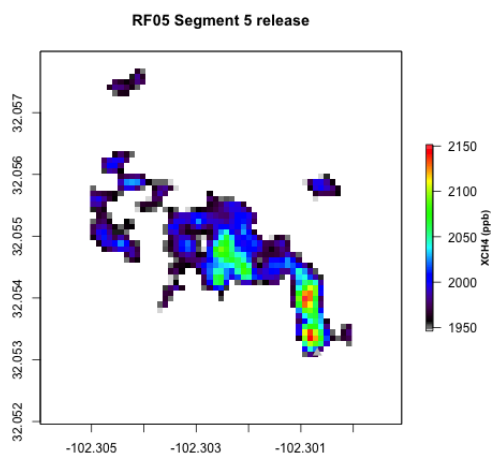

Figure S23: Filtered blinded-volume controlled release RF05 Segment 5.

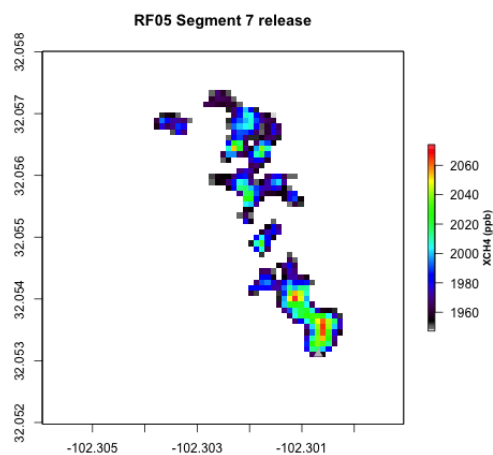

Figure S24: Filtered blinded-volume controlled release RF05 Segment 7.

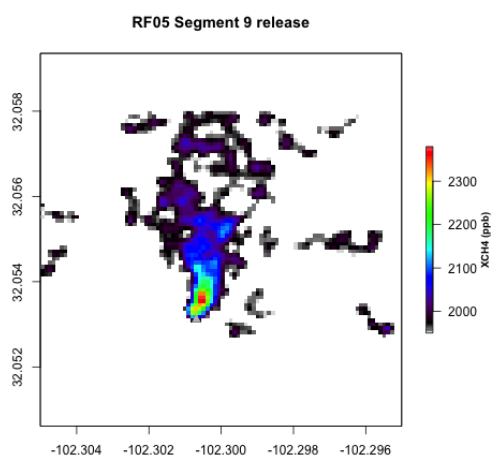

Figure S25: Filtered blinded-volume controlled release RF05 Segment 9.

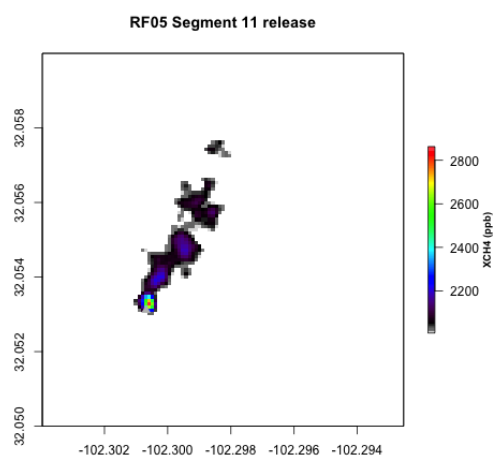

Figure S26: Filtered blinded-volume controlled release RF05 Segment 11.

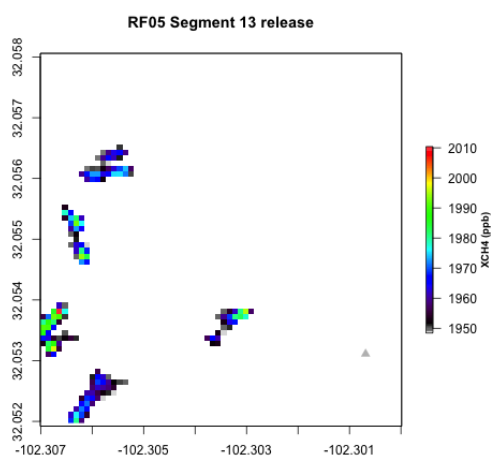

Figure S27: Filtered blinded-volume controlled release RF05 Segment 13.

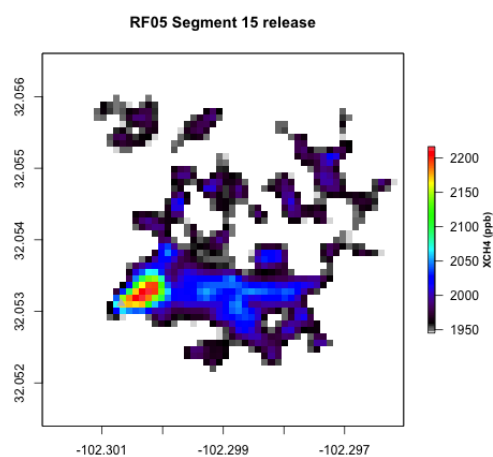

Figure S28: Filtered blinded-volume controlled release RF05 Segment 15.

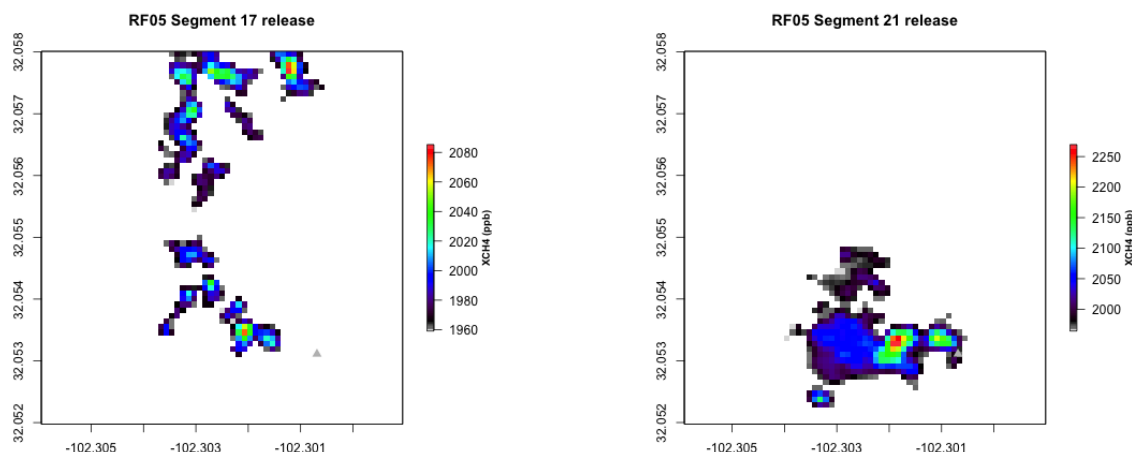

Figure S29: Filtered blinded-volume controlled release RF05 Segment 17. Figure S30: Filtered blinded-volume controlled release RF05 Segment 21.

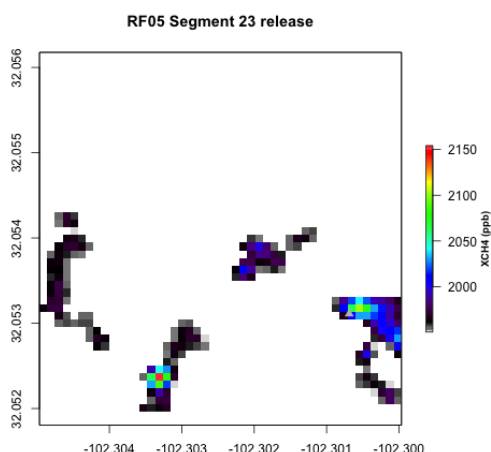

Figure S31: Filtered blinded-volume controlled release RF05 Segment 23.

## References

- Conley, S., Faloona, I., Mehrotra, S., Suard, M., Lenschow, D. H., Sweeney, C., Herndon, S., Schwietzke, S., Pétron, G., Pifer, J., Kort, E. A., and Schnell, R.: Application of Gauss's theorem to quantify localized surface emissions from airborne measurements of wind and trace gases, *Atmospheric Measurement Techniques*, 10, 3345–3358, <https://doi.org/10.5194/amt-10-3345-2017>, 2017.
- Irakulis-Loitxate, I., Guanter, L., Liu, Y.-N., Varon, D. J., Maasakkers, J. D., Zhang, Y., Chulakadabba, A., Wofsy, S. C., Thorpe, A. K., Duren, R. M., Frankenberg, C., Lyon, D. R., Hmiel, B., Cusworth, D. H., Zhang, Y., Segl, K., Gorroño, J., Sánchez-García, E., Sulprizio, M. P., Cao, K., Zhu, H., Liang, J., Li, X., Aben, I., and Jacob, D. J.: Satellite-based survey of extreme methane emissions in the Permian basin, *Science Advances*, 7, eabf4507, <https://doi.org/10.1126/sciadv.abf4507>, 2021.
- Rutherford, J. S., Sherwin, E. D., Chen, Y., Aminfard, S., and Brandt, A. R.: Evaluating methane emission quantification performance and uncertainty of aerial technologies via high-volume single-blind controlled releases, URL <https://eartharxiv.org/repository/view/5113/>, publisher: EarthArXiv, 2023.
- Sherwin, E. D., Rutherford, J. S., Chen, Y., Aminfard, S., Kort, E. A., Jackson, R. B., and Brandt, A. R.: Single-blind validation of space-based point-source methane emissions detection and quantification, URL <https://eartharxiv.org/repository/view/3465/>, publisher: EarthArXiv, 2022.

- Sun, K., Zhu, L., Cady-Pereira, K., Chan Miller, C., Chance, K., Clarisse, L., Coheur, P.-F., González Abad, G., Huang, G., Liu, X., Van Damme, M., Yang, K., and Zondlo, M.: A physics-based approach to oversample multi-satellite, multispecies observations to a common grid, *Atmospheric Measurement Techniques*, 11, 6679–6701, <https://doi.org/10.5194/amt-11-6679-2018>, publisher: Copernicus GmbH, 2018.
- Varon, D. J., Jacob, D. J., McKeever, J., Jervis, D., Durak, B. O. A., Xia, Y., and Huang, Y.: Quantifying methane point sources from fine-scale satellite observations of atmospheric methane plumes, *Atmospheric Measurement Techniques*, 11, 5673–5686, <https://doi.org/10.5194/amt-11-5673-2018>, 2018.
- York, D.: Least squares fitting of a straight line with correlated errors, *Earth and Planetary Science Letters*, 5, 320–324, [https://doi.org/10.1016/S0012-821X\(68\)80059-7](https://doi.org/10.1016/S0012-821X(68)80059-7), 1968.
- York, D., Evensen, N. M., Martinez, M. L., and De Basabe Delgado, J.: Unified equations for the slope, intercept, and standard errors of the best straight line, *American Journal of Physics*, 72, 367–375, <https://doi.org/10.1119/1.1632486>, publisher: American Association of Physics Teachers, 2004.
